# Supplementary material for: Ternary photocatalysts based on MOF-derived TiO2 co-decorated with ZnIn2S4 nanosheets and CdS nanoparticles for effective visible light degradation of organic pollutants
Source: Royal Society of Chemistry journal article supplement (doi:10.1039/d2nj00533f), 2022-01-01
Supplement: d2nj00533f1.pdf [file d2nj00533f1.pdf]

Electronic Supplementary Material (ESI) for New Journal of Chemistry.

This journal is © The Royal Society of Chemistry and the Centre National de la Recherche Scientifique 2022

## Supporting Information

### **Ternary photocatalysts based on MOF-derived TiO<sub>2</sub> co-decorated with ZnIn<sub>2</sub>S<sub>4</sub> nanosheets and CdS nanoparticles for effective visible light degradation of organic pollutants**

Huan Liu<sup>ab</sup>, Jingzhe Li<sup>ab</sup>, Yue Chen<sup>ab</sup>, Xuting Sun<sup>b</sup>, Xun Xu<sup>ab</sup>, Lingfang Qiu<sup>ab</sup>, Shuwang Duo<sup>\*ab</sup> and Ping Li<sup>\*ab</sup>

<sup>a</sup>Jiangxi Key Laboratory of Surface Engineering, Jiangxi Science and Technology Normal University,

Nanchang, Jiangxi 330013, P. R. China, dsw@jxstnu.edu.cn, lp1849065552@163.com

<sup>b</sup>School of Materials and Mechanical & Electrical Engineering, Jiangxi Science and Technology Normal University, Nanchang 330013, P. R. China

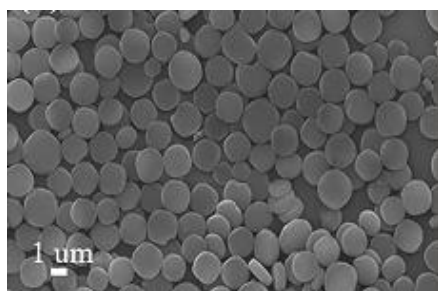

**Fig. S1** SEM image of MIL-125.

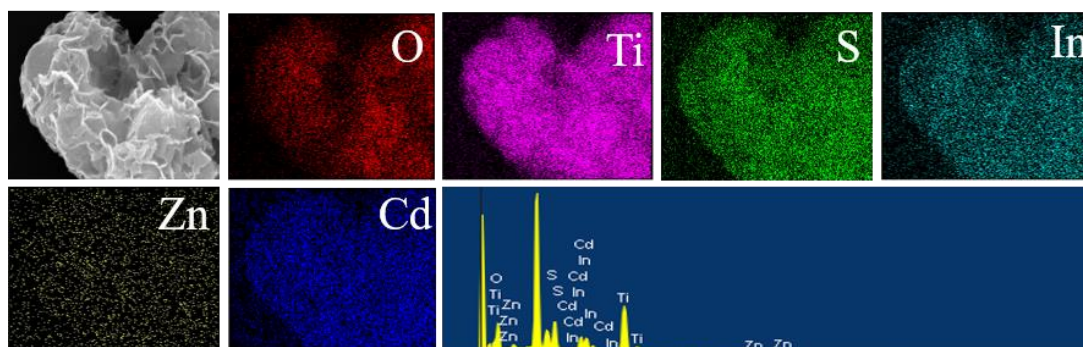

**Fig. S2** EDS mapping of CdS/ZnIn<sub>2</sub>S<sub>4</sub>/TiO<sub>2</sub>-II.

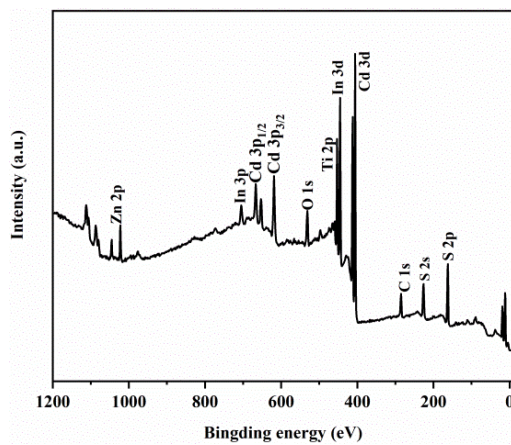

**Fig. S3** XPS survey scan spectrum of CdS/ZnIn<sub>2</sub>S<sub>4</sub>/TiO<sub>2</sub>-II.

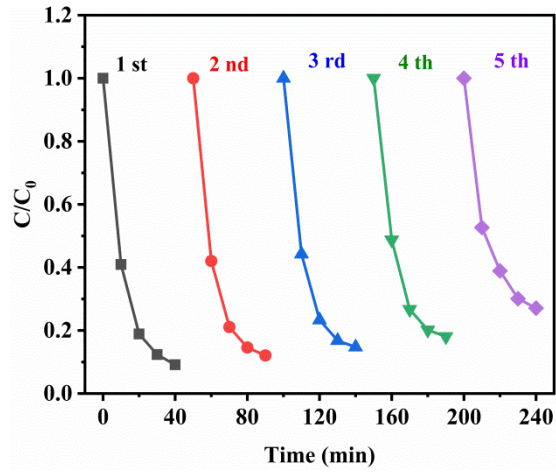

**Fig. S4** Recycling experiments of photocatalytic TC degradation.

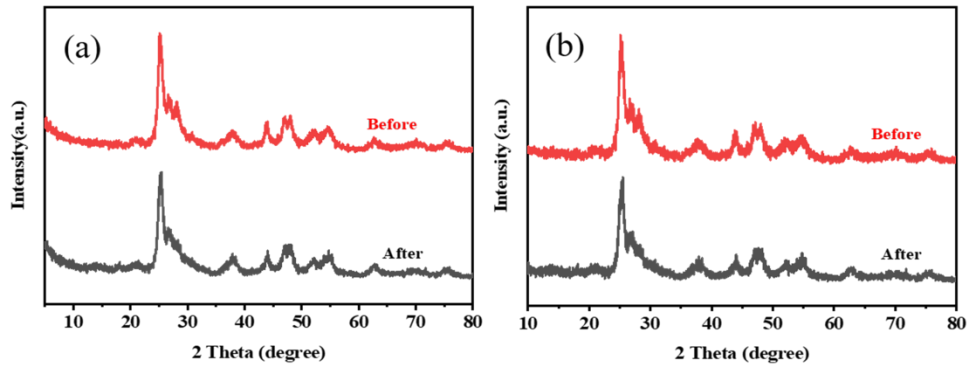

**Fig. S5** XRD patterns of CdS/ZnIn<sub>2</sub>S<sub>4</sub>/TiO<sub>2</sub>-II before and after 5-cycle test in the photodegradation of RhB (a) and TC (b).

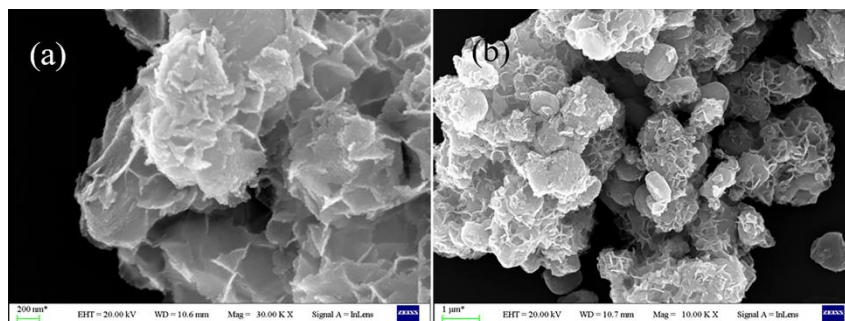

**Fig. S6** SEM images of CdS/ZnIn<sub>2</sub>S<sub>4</sub>/TiO<sub>2</sub>-II after 5-cycle test in the photodegradation of RhB (a) and TC (b).
